# Supplementary material for: Preference of Polistes dominula wasps for trumpet creepers when infected by Xenos vesparum: A novel example of co-evolved traits between host and parasite
Source: PLoS One. 2018 Oct 24;13(10):e0205201. doi: 10.1371/journal.pone.0205201 (PMC6200222; doi:10.1371/journal.pone.0205201)
Supplement: S1 Table — Wasp collections on 4 bushes (A, B, R, J) from 2009 to 2015 (see Fig 2). (XLSX) [file pone.0205201.s001.xlsx]

## Sheet: Foglio1
	% par(par/no)	% par(par/no)	% par(par/nol)	% par(par/no)	% par(par/no)	% par(par/no)	% par(par/no)	TOT par	TOT no	TOT	% par
Bush	2009-07-02	2010-07-02	2011-07-04	2012-06-22	2013-06-28	2014-06-18	2015-06-18
A	65 (13/7)	64.3(18/10)	68(17/8)	80(15/4)	76.5(13/4)	64.1(25/14)	73.3(11/4)	112	51	163	68.7
B	56.2(9/7)	61.9(13/8)	61.5%(8/5)	75(6/2)	71.4(5/2)	72.2(13/5)	69.2(9/4)	63	33	96	65.6
R	0(0/17)	0(0/15)	0(0/13)	0(0/11)	0(0/9)	0(0/19)	0(0/14)	0	95	95	0
J	8.33(1/20)	0(0/24)	11.5(3/23)	0(0/16)	0(0/18)	3.2(1/30)	0(0/22)	5	153	158	3.2
